# Supplementary material
Source: publisher figshare collection journal article supplement (https://frontiersin.figshare.com/ndownloader/files/14961989)

Figure S1

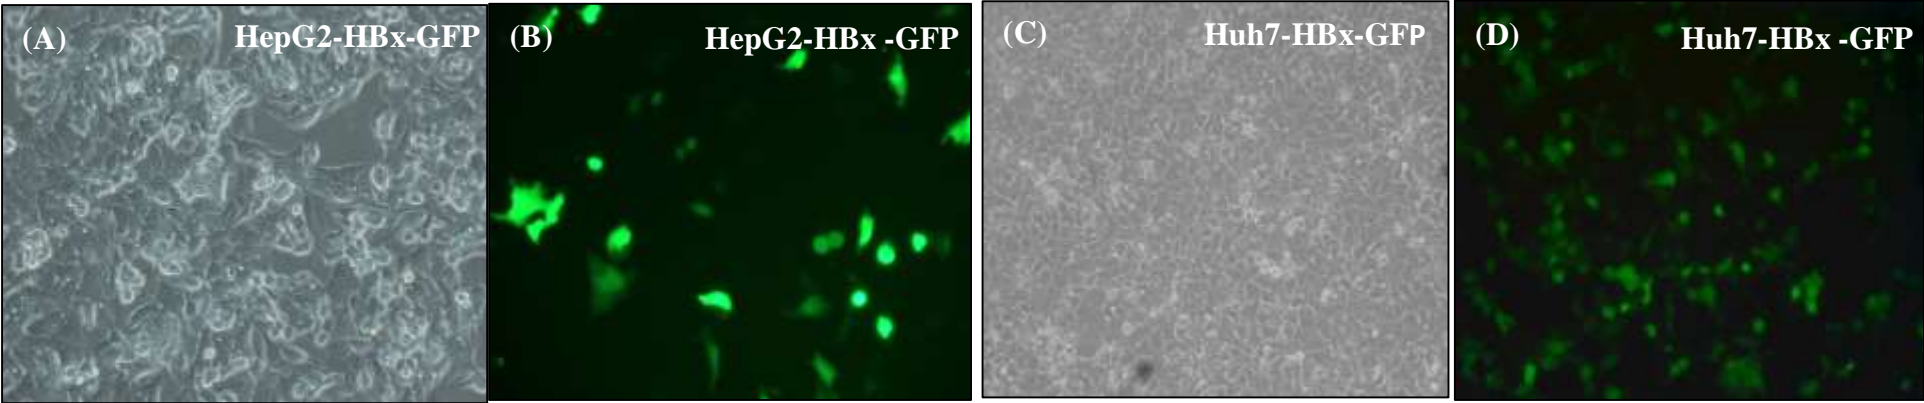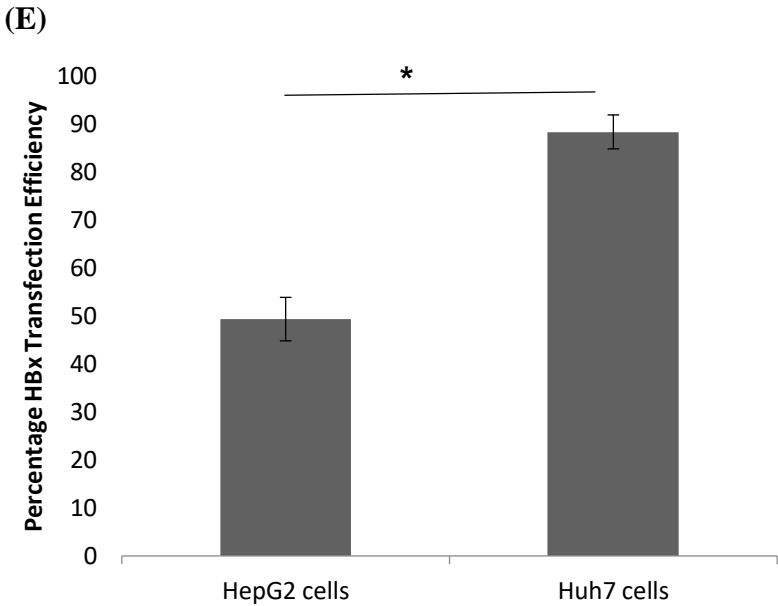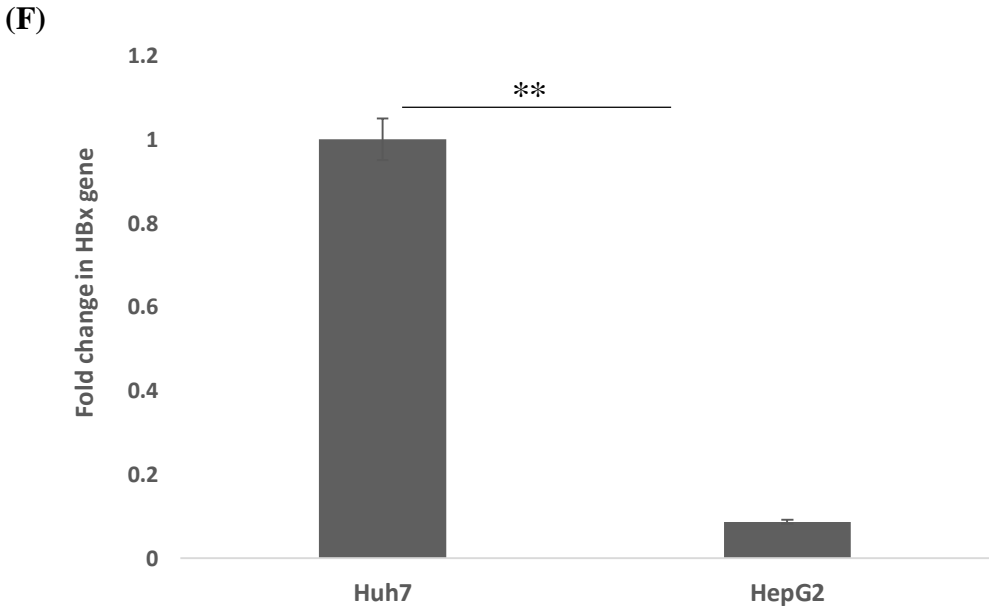

Figure S2

(A)

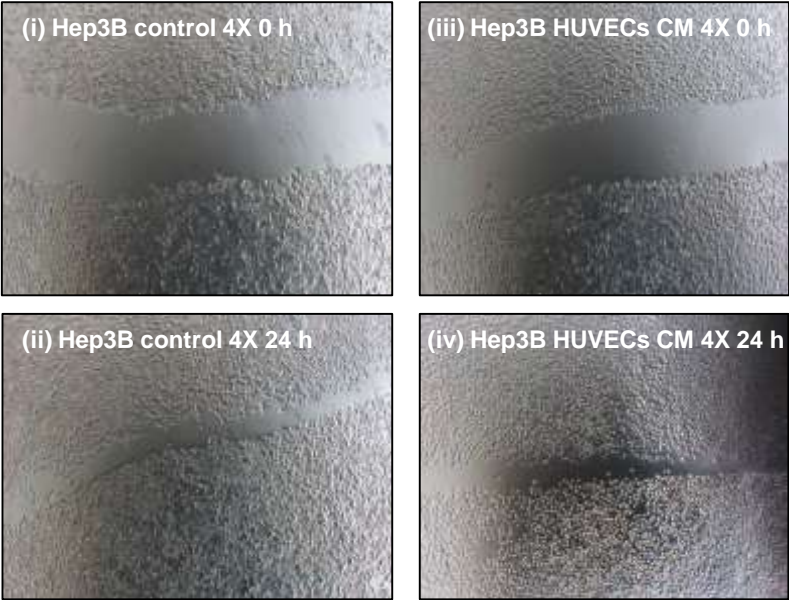

(B)

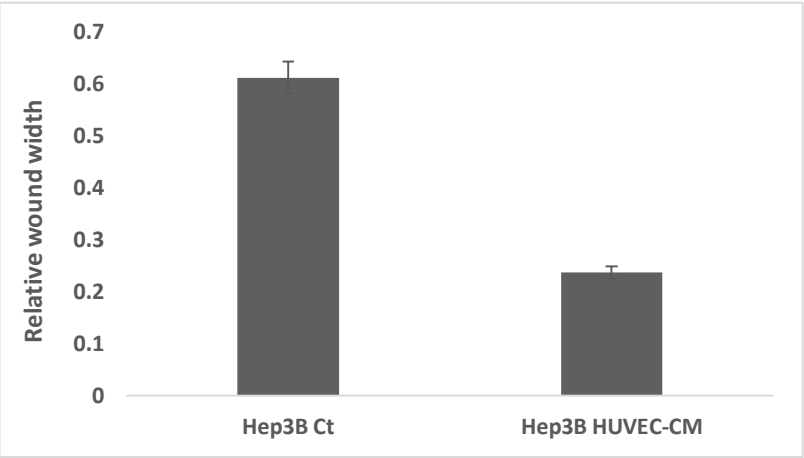

(C)

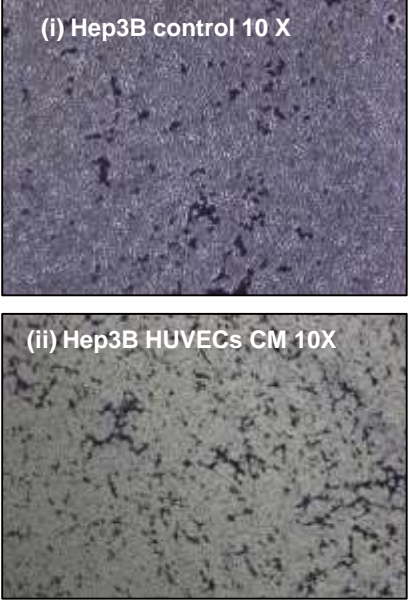

(D)

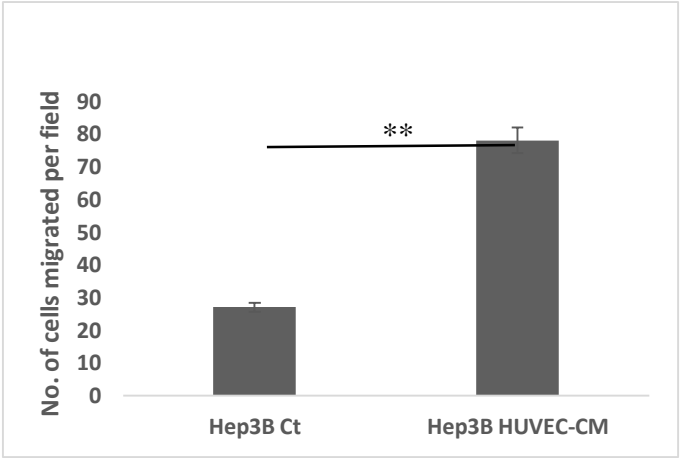

**Figure S3**

**(A)**

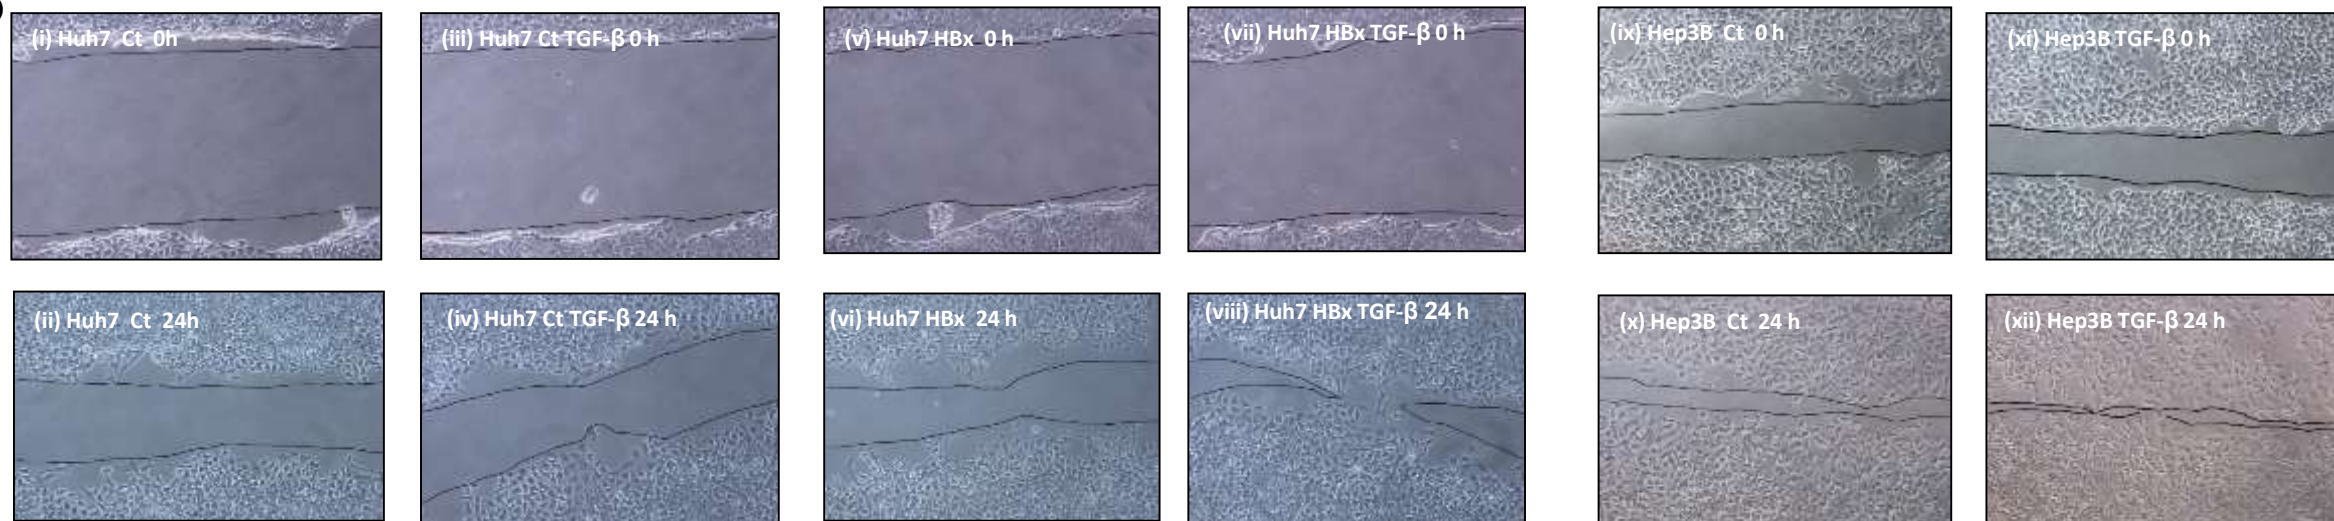

**(B)**

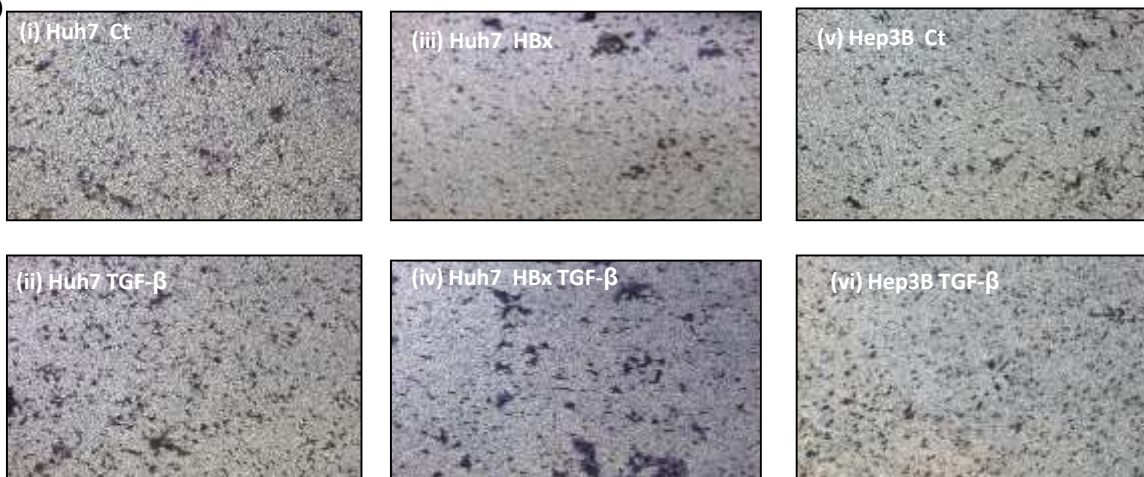

**(C)**

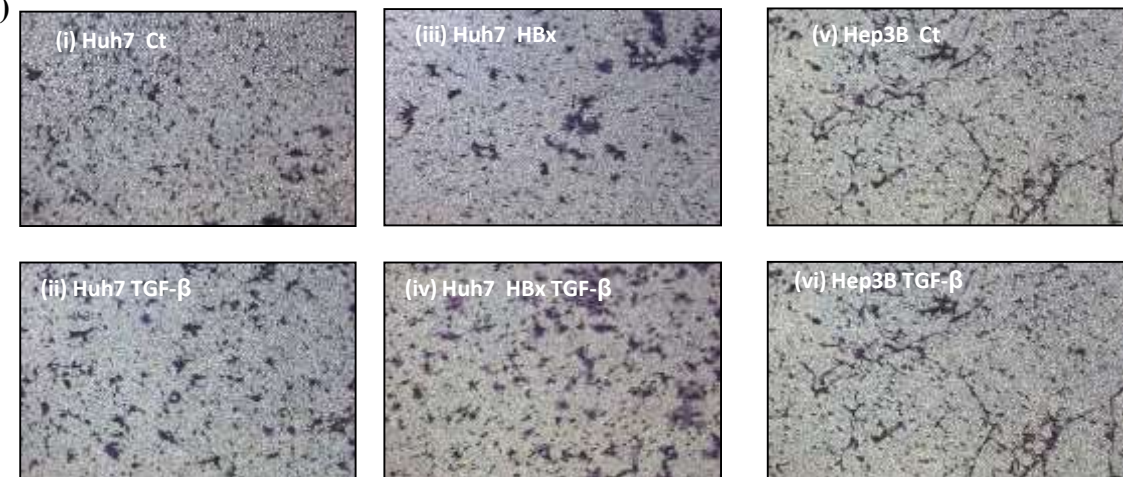



Figure S4

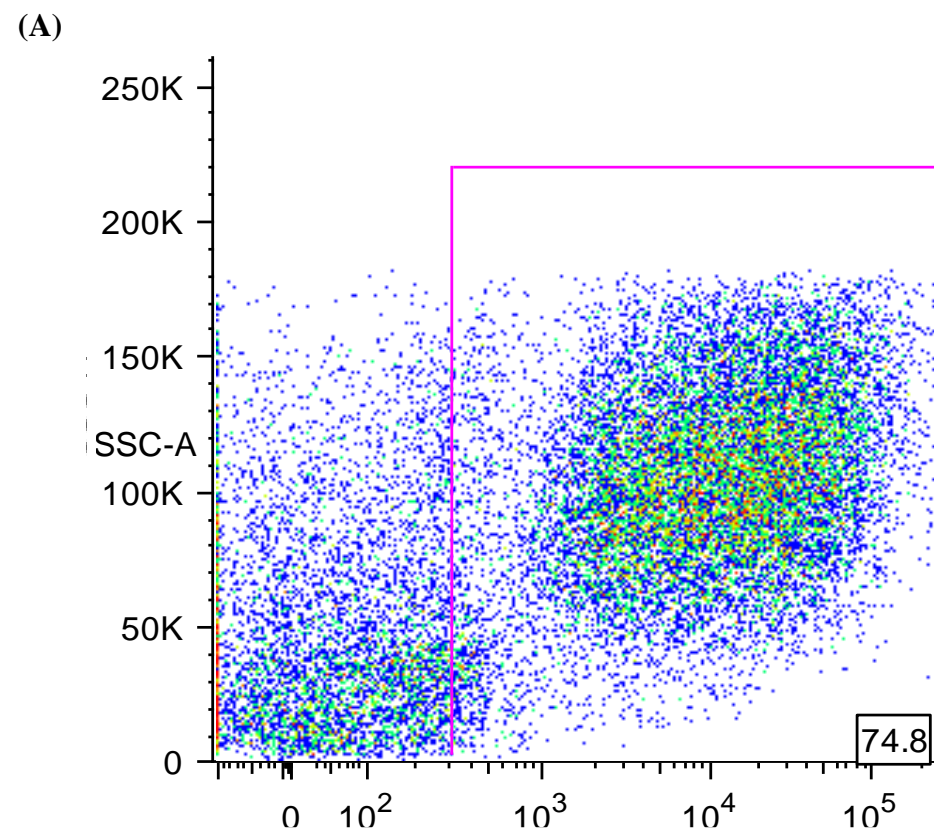

Huh7 cells control siRNA transfected

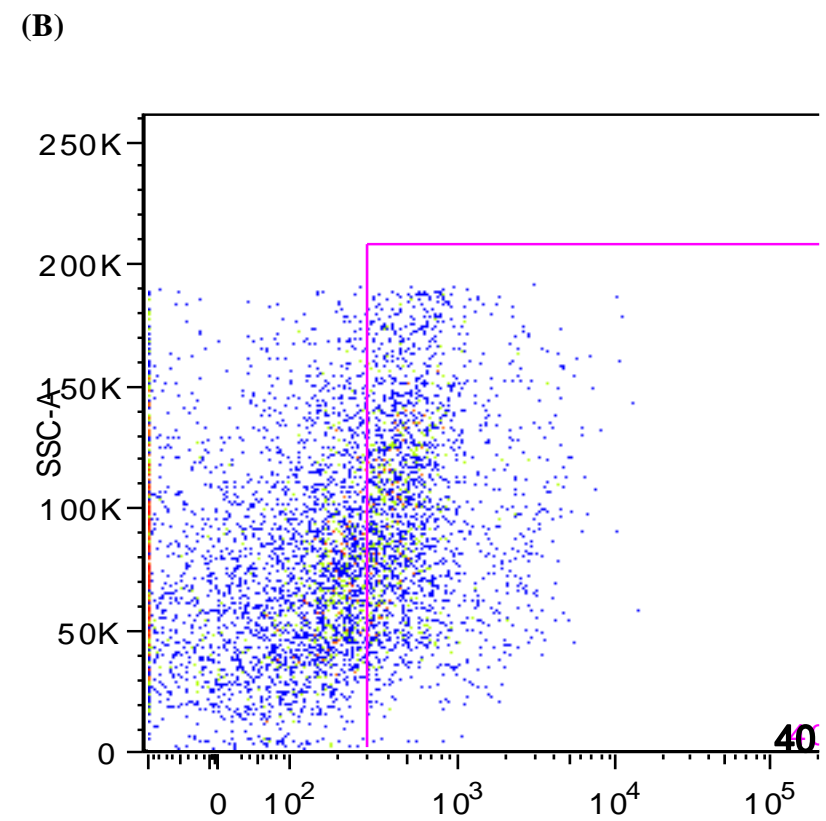

Huh7 cells CD133 siRNA transfected

**Figure S5**

**(A)**

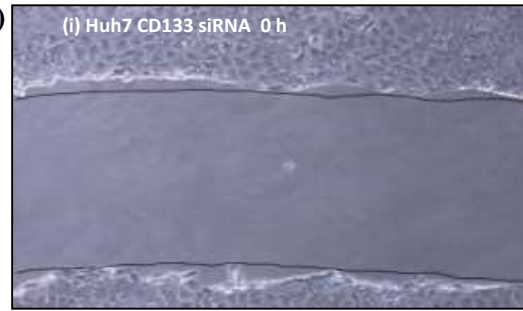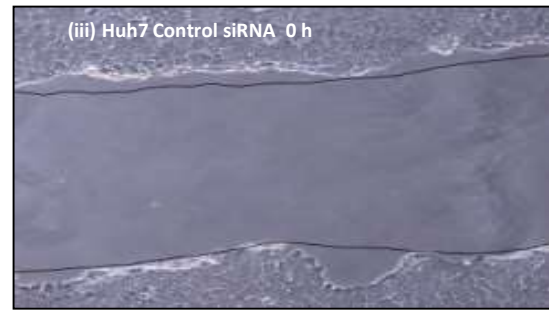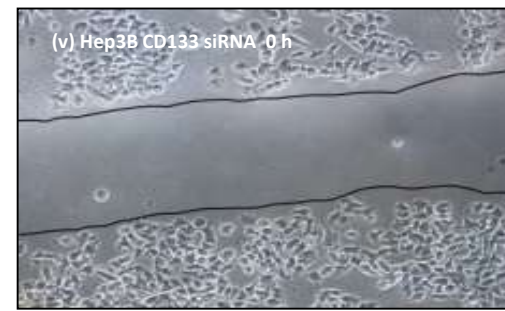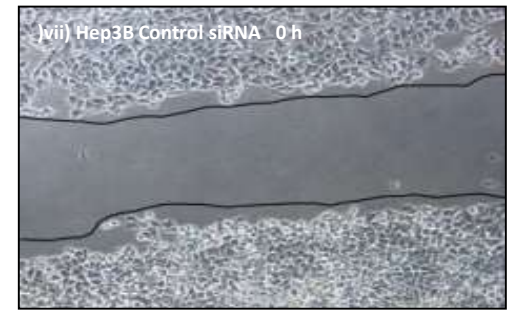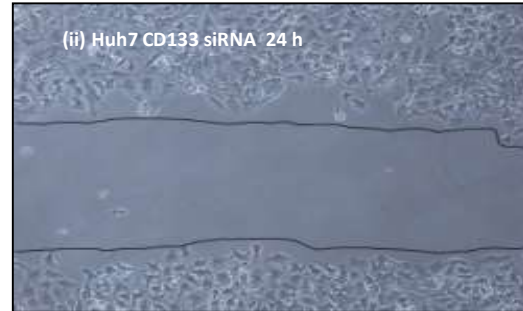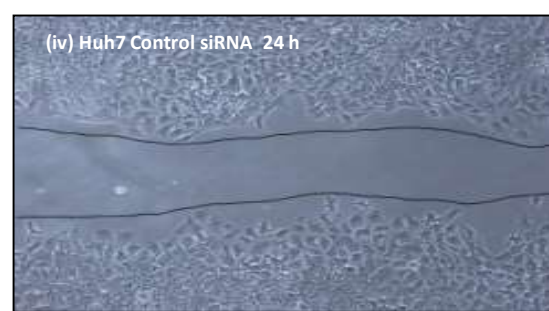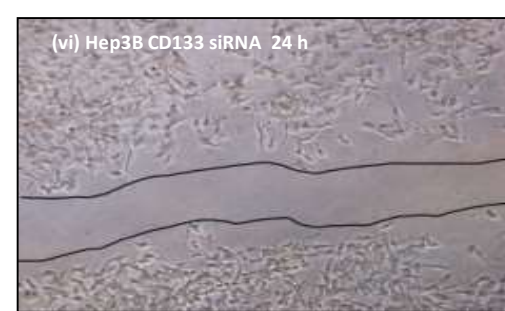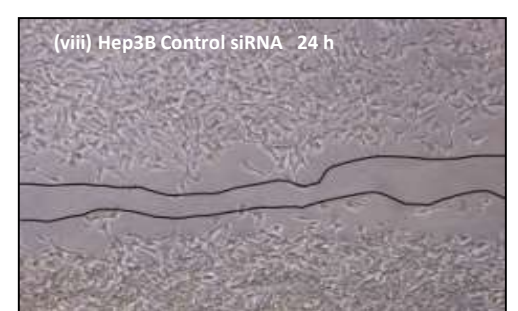

**(B)**

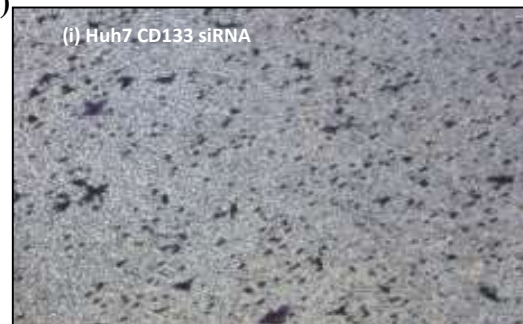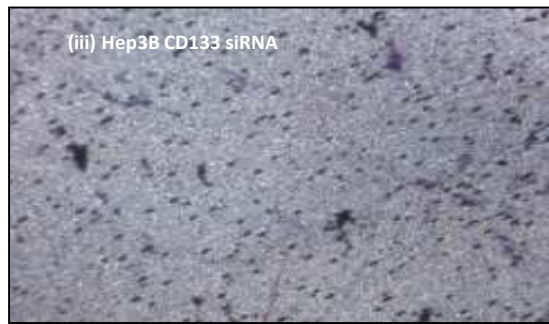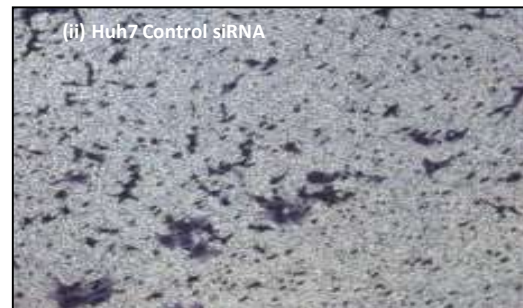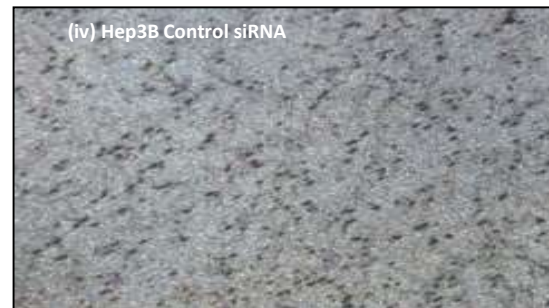

**(C)**

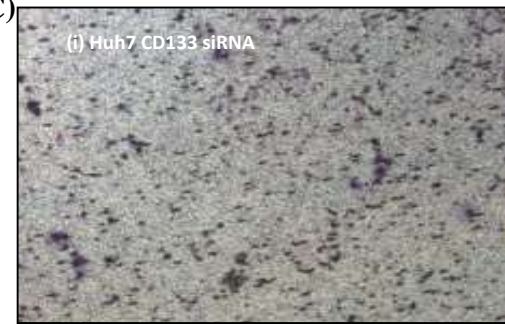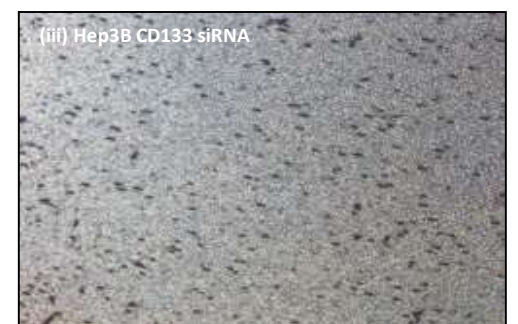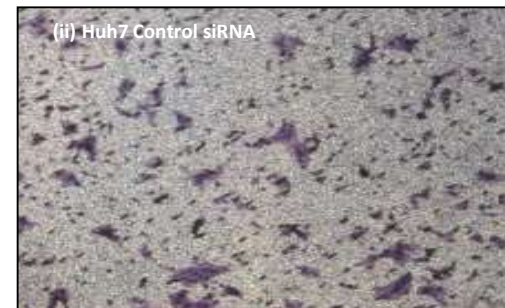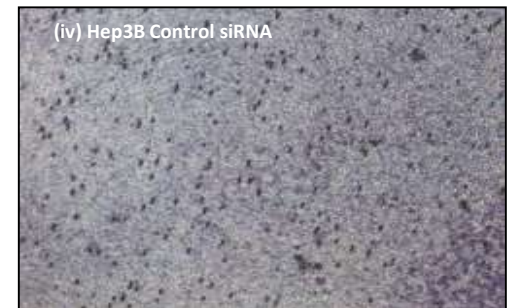

Supplement: Supplementary file [file 14961989]
